# Supplementary material for: A stable inverse opal structure of cadmium chalcogenide for efficient water splitting
Source: Royal Society of Chemistry journal article supplement (doi:10.1039/c5ta03845f), 2015-01-01
Supplement: c5ta03845f1.pdf [file c5ta03845f1.pdf]

Supporting information for

# Stable Inverse Opal Structure of Cadmium Chalcogenide for Efficient Water Splitting

Yi-Ren Lu,<sup>‡</sup> Peng-Fei Yin,<sup>‡</sup> Jing Mao, Meng-Jiao Ning, Yu-Zhu Zhou, Cun-Ku Dong, Tao Ling\* and

Xi-Wen Du\*

<sup>‡</sup> These authors contribute equally to this work.

Tianjin Key Laboratory of Composite and Functional Materials, School of Materials Science and

Engineering, Tianjin University, Tianjin 300072, People's Republic of China

## Supplementary Figures

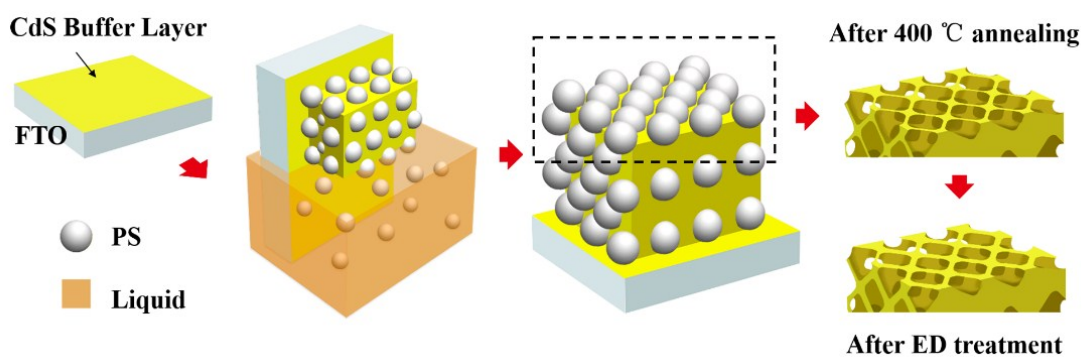

**Figure S1.** Schematic diagram on the fabrication of CdS IOS.

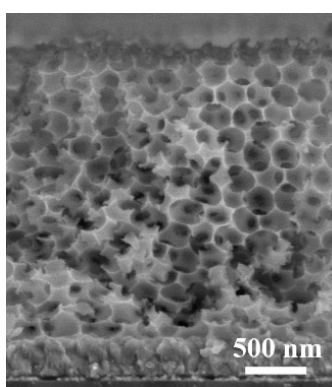

**Figure S2.** Side-view SEM image of the final CdS IOS.

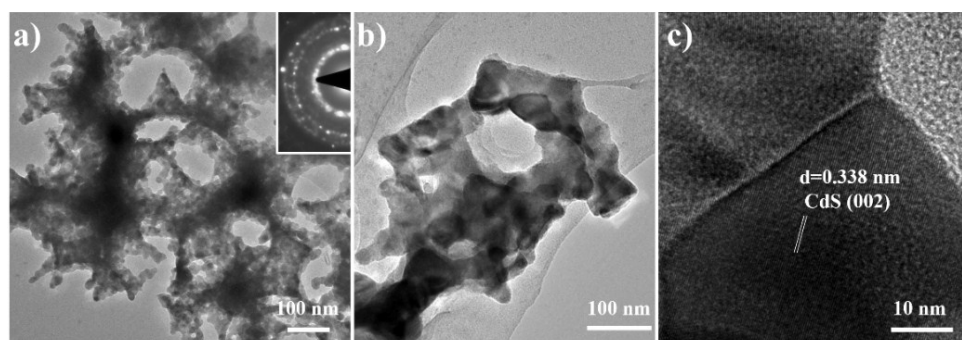

**Figure S3.** Characterizations of IOS. (a) low magnification and (b) high magnification TEM images, the insert of (a) is a SAED pattern, (c) HRTEM image.

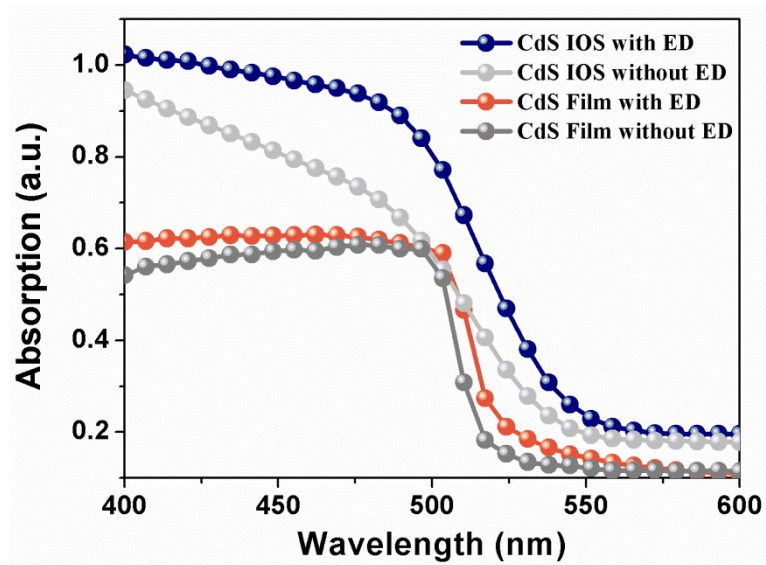

**Figure S4.** Absorbance spectra of IOS and film with and without ED processing.

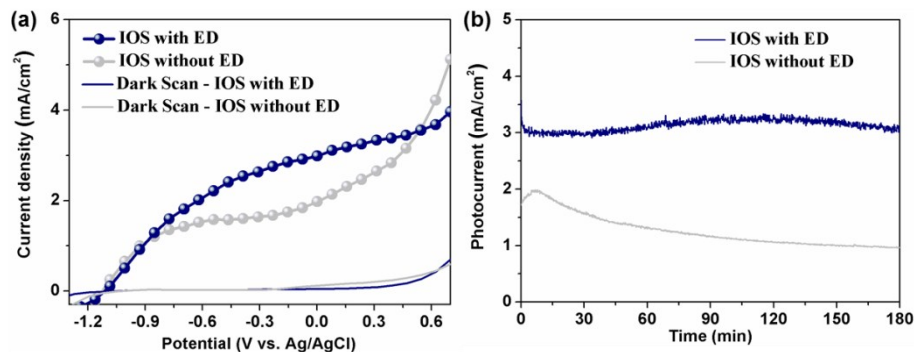

**Figure S5.** PEC response of original CdS IOS. (a) Linear sweep voltammograms measurements under 1 sun AM1.5 illumination and in the dark. (b) Photocurrent stability of the IOS photoanode at 0 V versus RHE under AM 1.5 illumination.

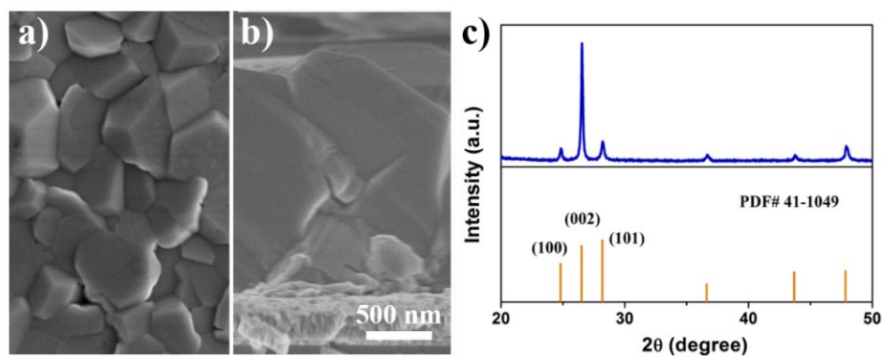

**Figure S6.** Characterizations of the CdS film. (a) the top-view and (b) side-view SEM images, (c) XRD pattern.

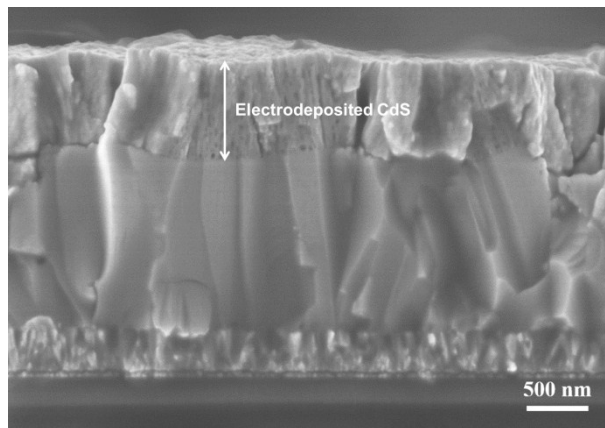

**Figure S7.** Cross-section SEM image of planar CdS film after ED and subsequent calcination.

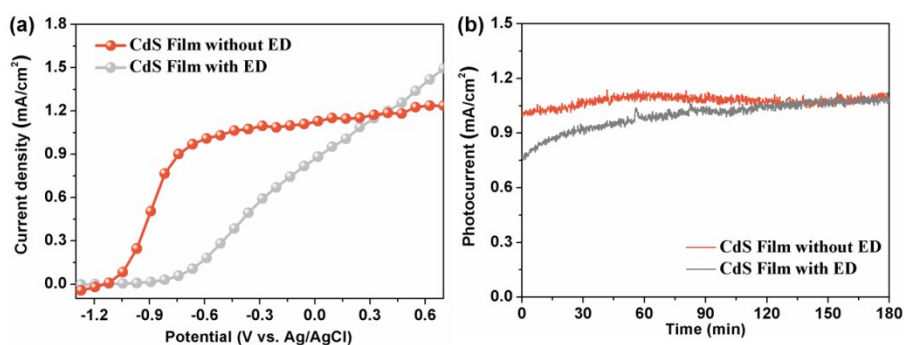

**Figure S8.** PEC response of original and treated CdS film. (a) Linear sweep voltammograms measurements under 1 sun AM1.5 illumination and in the dark. (b) Photocurrent stability and time evolution of the IOS photoanode at 0 V versus RHE under AM 1.5 illumination.

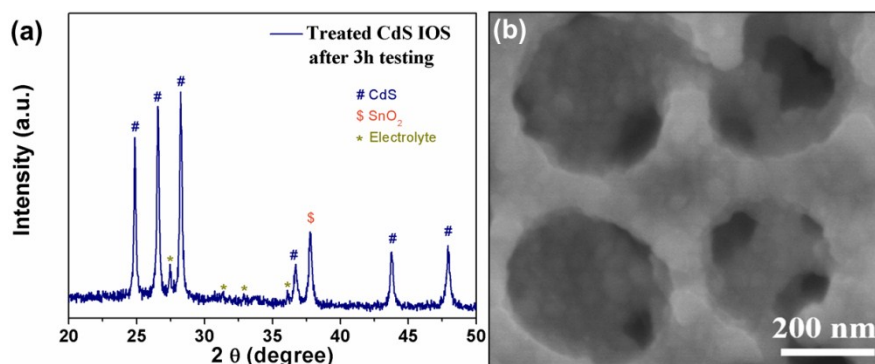

**Figure S9.** Characterizations of the treated CdS IOS after stability test. (a) XRD pattern, (b) high-resolution SEM image.

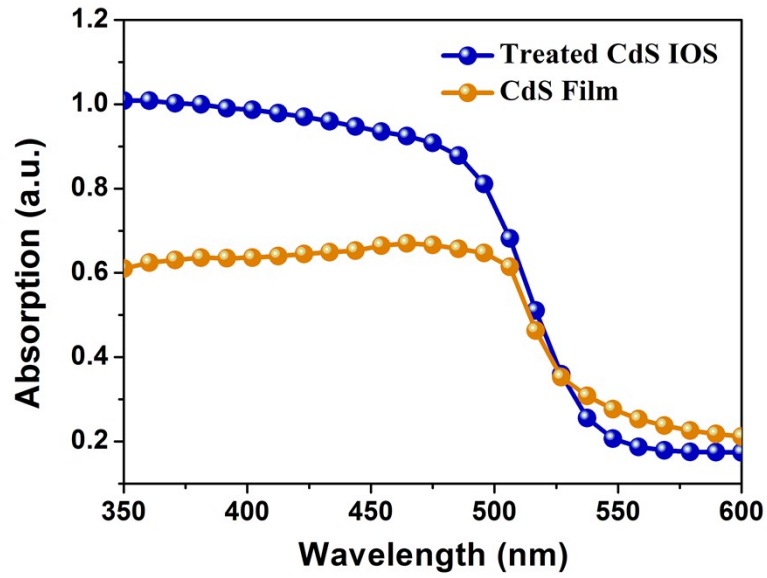

**Figure R10.** The absorbance spectra of treated CdS IOS and CdS film. The Y-axis is the absorbance intensity.

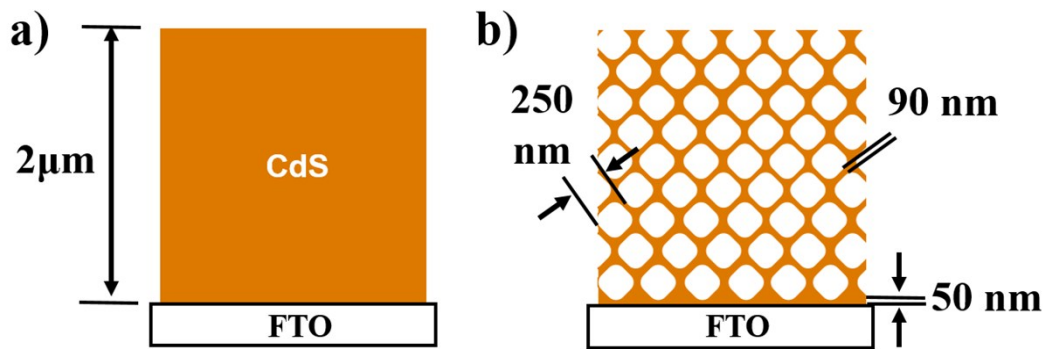

**Figure S11.** Structural models for FDTD simulation. (a) thin film, (b) IOS.

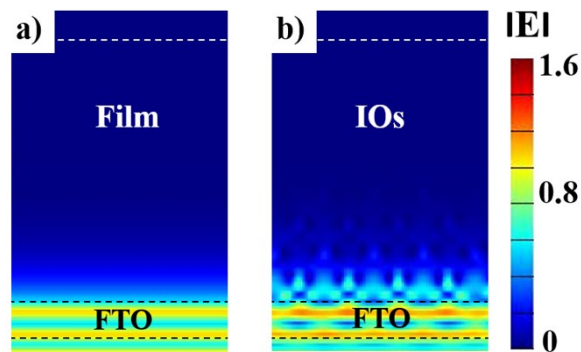

**Figure S12.** Simulated electromagnetic field distributions of (a) thin film, (b) IOS under the TE-polarized illumination at 500 nm from the FTO side.

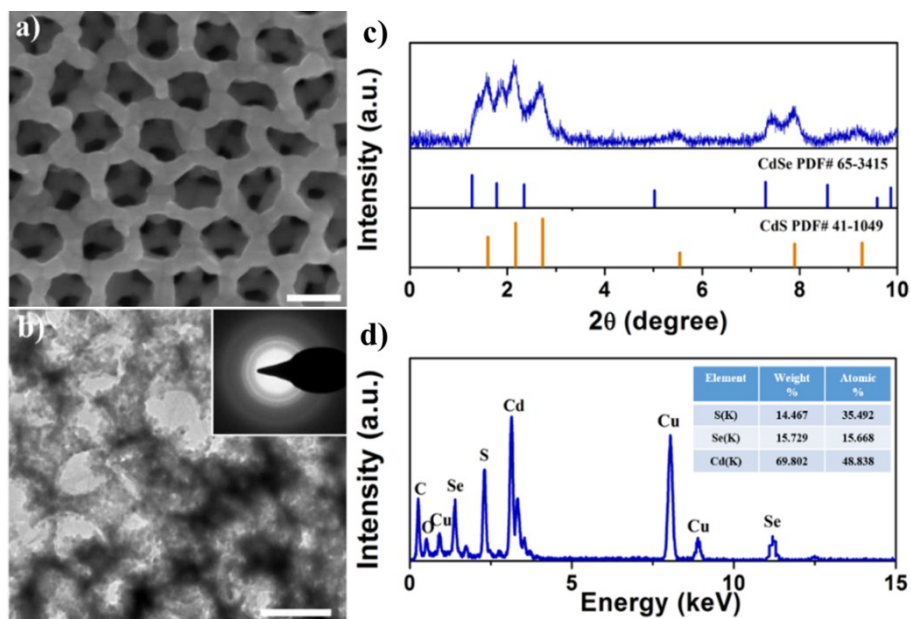

**Figure S13.** Characterizations of the CdS/CdSe IOS. (a) top-view SEM image, (b) TEM image and corresponding SAED pattern (insert). Scale bar represents 200 nm, (c) XRD pattern, (d) EDS pattern.

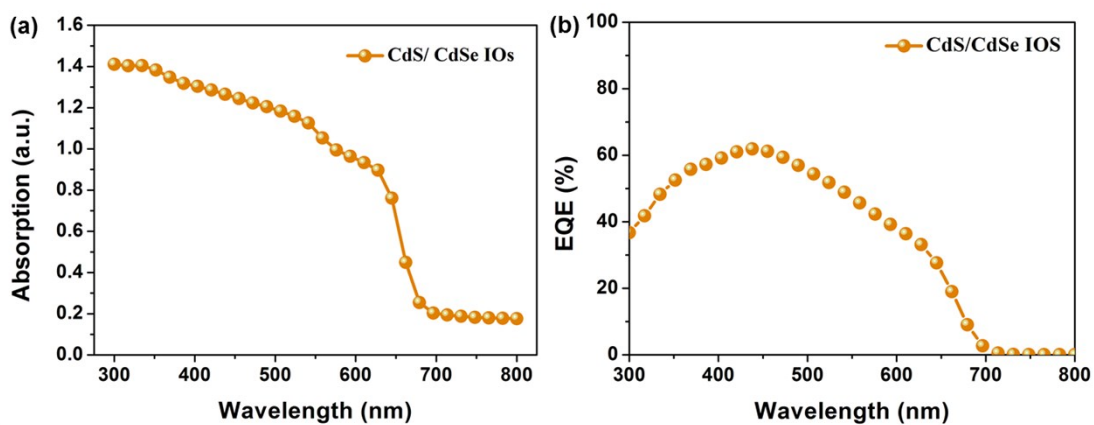

**Figure S14.** (a) and (b) are absorption and IPEC spectra of CdS/CdSe IOS. The IPCE test was conducted under 1 sun AM 1.5 illumination, at 0 V vs Ag/AgCl reference electrode.

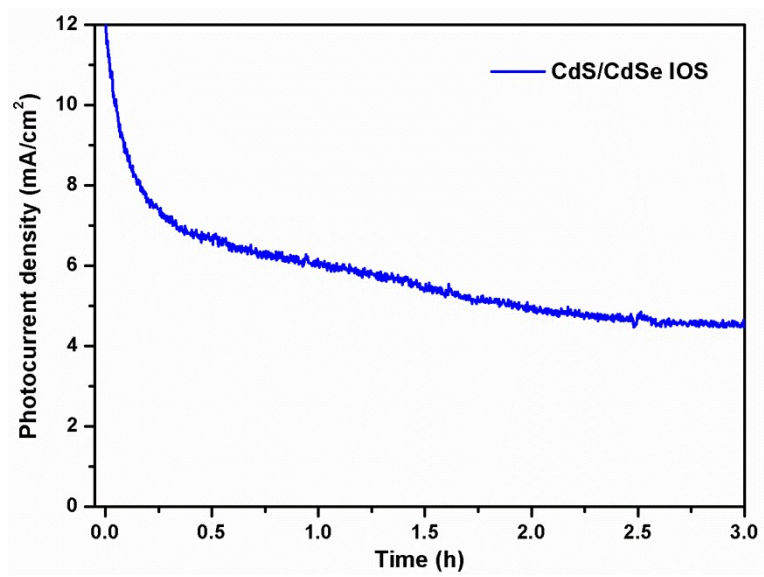

**Figure S15.** The photocurrent stability of CdS/CdSe IOS.
